# Supplementary material for: The X‐linked juvenile retinoschisis protein retinoschisin is a novel regulator of mitogen‐activated protein kinase signalling and apoptosis in the retina
Source: PubMed Central journal article supplement (PMC5345684; doi:10.1111/jcmm.13019), 2016-12-20
Supplement: JCMM-21-768-s002.pdf [file JCMM-21-768-s002.pdf]

| Primer Name     | Sequence (5' to 3')                                                       | Use                                                          |
|-----------------|---------------------------------------------------------------------------|--------------------------------------------------------------|
| hATP1A3-Ex1-F   | AGA TGG GGG ACA AGA AAG ATG AC                                            | semiquantitative PCR against human target genes              |
| hATP1A3-Ex9-R   | CCT CAA GCC AGG TGA TCC G                                                 |                                                              |
| hATP1B2-Ex-4-F  | CAA ACG TGC CTG CCA ATT CA                                                |                                                              |
| hATP1B2-Ex7-R   | TCC ACA GGA GAG AGA TGG GG                                                |                                                              |
| hRS1-ex4-5-F    | AGT CAA GGC TTT GGG TGT GCC TG                                            |                                                              |
| hRS1-ex6-R      | TGG CAA TGC GGA CGT GCC AG                                                |                                                              |
| GusB-Ex11-12_F  | GGT TGG AGA GCT CAT TTG GA                                                |                                                              |
| GusB-Ex11-12_   | CAC GCA GGT GGT ATC AGT CTT                                               |                                                              |
| mATP1A3-Ex1-F   | CGC TCA TCA GTC TGA ACG CC                                                | semiquantitative PCR against murine target genes             |
| mATP1A3-Ex6-R   | CGG TCA CCA CCC TTG ATC TC                                                |                                                              |
| mATP1B2-Ex-1-F  | CCC TTT CTA TCG CAG TCG G                                                 |                                                              |
| mATP1B2-Ex4-R   | AAC ATG CTG ACC CCA GCT TT                                                |                                                              |
| RT_mRs1_F2      | GTC AAG GTT TTG GGT GTG CT                                                |                                                              |
| RT_mRs1_R2      | AAC TCC GGTCTG AGT TTC CA                                                 |                                                              |
| RT_mGusb_F1     | CCC TAA AAT GGA GTG CGT GT                                                |                                                              |
| RT_mGusb_R1     | AAT GGG CAC TGT TGA TCC TC                                                |                                                              |
| hFOS-qRT-F      | ACT ACC ACT CAC CCG CAG AC                                                | quantitative real-time RT PCR against human target genes     |
| hFOS-qRT-R      | CCA GGT CCG TGC AGA AGT                                                   |                                                              |
| hEGR-qRT-F      | AGC CCT ACG AGC ACC TGA C                                                 |                                                              |
| hEGR1-qRT-R     | GGT TTG GCT GGG GTA ACT G                                                 |                                                              |
| hMYC-qRT-F      | GCT GCT TAG ACG CTG GAT TT                                                |                                                              |
| hMYC-qRT-R      | TAA CGT TGA GGG GCA TCG                                                   |                                                              |
| hBAX-qRT-F      | ATG TTT TCT GAC GGC AAC TTC                                               |                                                              |
| hBAX-qRT-R      | ATC AGT TCC GGC ACC TTG                                                   |                                                              |
| hHPRT-qRT-F     | TGA CCT TGA TTT ATT TTG CAT ACC                                           |                                                              |
| hHPRT-qRT-R     | CGA GCA AGA CGT TCA GTC CT                                                |                                                              |
| mFOS-qRT-F      | GGG ACA GCC TTT CCT ACT ACC                                               | quantitative real-time RT PCR against murine target genes    |
| mFOS-qRT-R      | AGA TCT GCG CAA AAG TCC TG                                                |                                                              |
| mEGR1-qRT-F     | CCT ATG AGC ACC TGA CCA CA                                                |                                                              |
| mEGR1-qRT-R     | TCG TTT GGC TGG GAT AAC TC                                                |                                                              |
| mMYC-qRT-F      | CCT AGT GCT GCA TGA GGA GA                                                |                                                              |
| mMYC-qRT-R      | TCC ACA GAC ACC ACA TCA ATT                                               |                                                              |
| mBAX-qRT-F      | GTG AGC GGC TGC TTG TCT                                                   |                                                              |
| mBAX-qRT-R      | GGT CCC GAA GTA GGA GAG GA                                                |                                                              |
| mHPRT-qRT-F     | TGA CAC TGG TAA AAC AAT GCA                                               |                                                              |
| mHPRT-qRT-R     | TCC TTT TCA CCA GCA AGC TTG                                               |                                                              |
| RS1-EcoRI-F     | GAA TTC ATG TCA CGC AAG ATA GAA GGC TTT TTG                               | Expression cloning <i>RS1</i>                                |
| RS1-XhoI-R      | CTC GAG TCA GGC ACA CTT GCT GAC GCA CTC                                   |                                                              |
| RS1-C59S-mut-F  | CCA CCT CCT TGG ACA GTA TAC CAG AAT GCC                                   | site directed mutagenesis                                    |
| RS1-C59S-mut-R  | GGC ATT CTG GTA TAC TGT CCA AGG AGG TGG                                   |                                                              |
| RS1-EcoRI-F     | GAA TTC ATG TCA CGC AAG ATA GAA GGC TTT TTG                               | cloning of N-terminal part of Myc-tagged <i>RS1</i> variants |
| RS1-n-termMyc-R | <b>TGA TCA ATT TCT GCT</b> CCG ATA ATC CCA ATG TGG CTT CAT AGC CAA AGA GA |                                                              |
| RS1-ntermMyc-F  | <b>TGA TCA GTG AGG AAG ATC TGT</b> CTA CCG AGG ATG AAG GCG AGG ACC CCT    | cloning of C-terminal part of Myc-tagged <i>RS1</i> variants |
| RS1-XhoI-R      | CTC GAG TCA GGC ACA CTT GCT GAC GCA CTC                                   |                                                              |

**Supplementary Table 1** Primers used in RNA analyses and expression cloning.
